# Supplementary material for: PINK1 phosphorylates ubiquitin to activate Parkin E3 ubiquitin ligase activity
Source: PubMed Central journal article supplement — J Cell Biol. 2014 Apr 28;205(2):143–53. doi: 10.1083/jcb.201402104 (PMC4003245; doi:10.1083/jcb.201402104), 2014-04-28
Supplement: supp_jcb.201402104_JCB_201402104_sm.pdf [file supp_jcb.201402104_JCB_201402104_sm.pdf]

Kane et al., <http://www.jcb.org/cgi/content/full/jcb.201402104/DC1>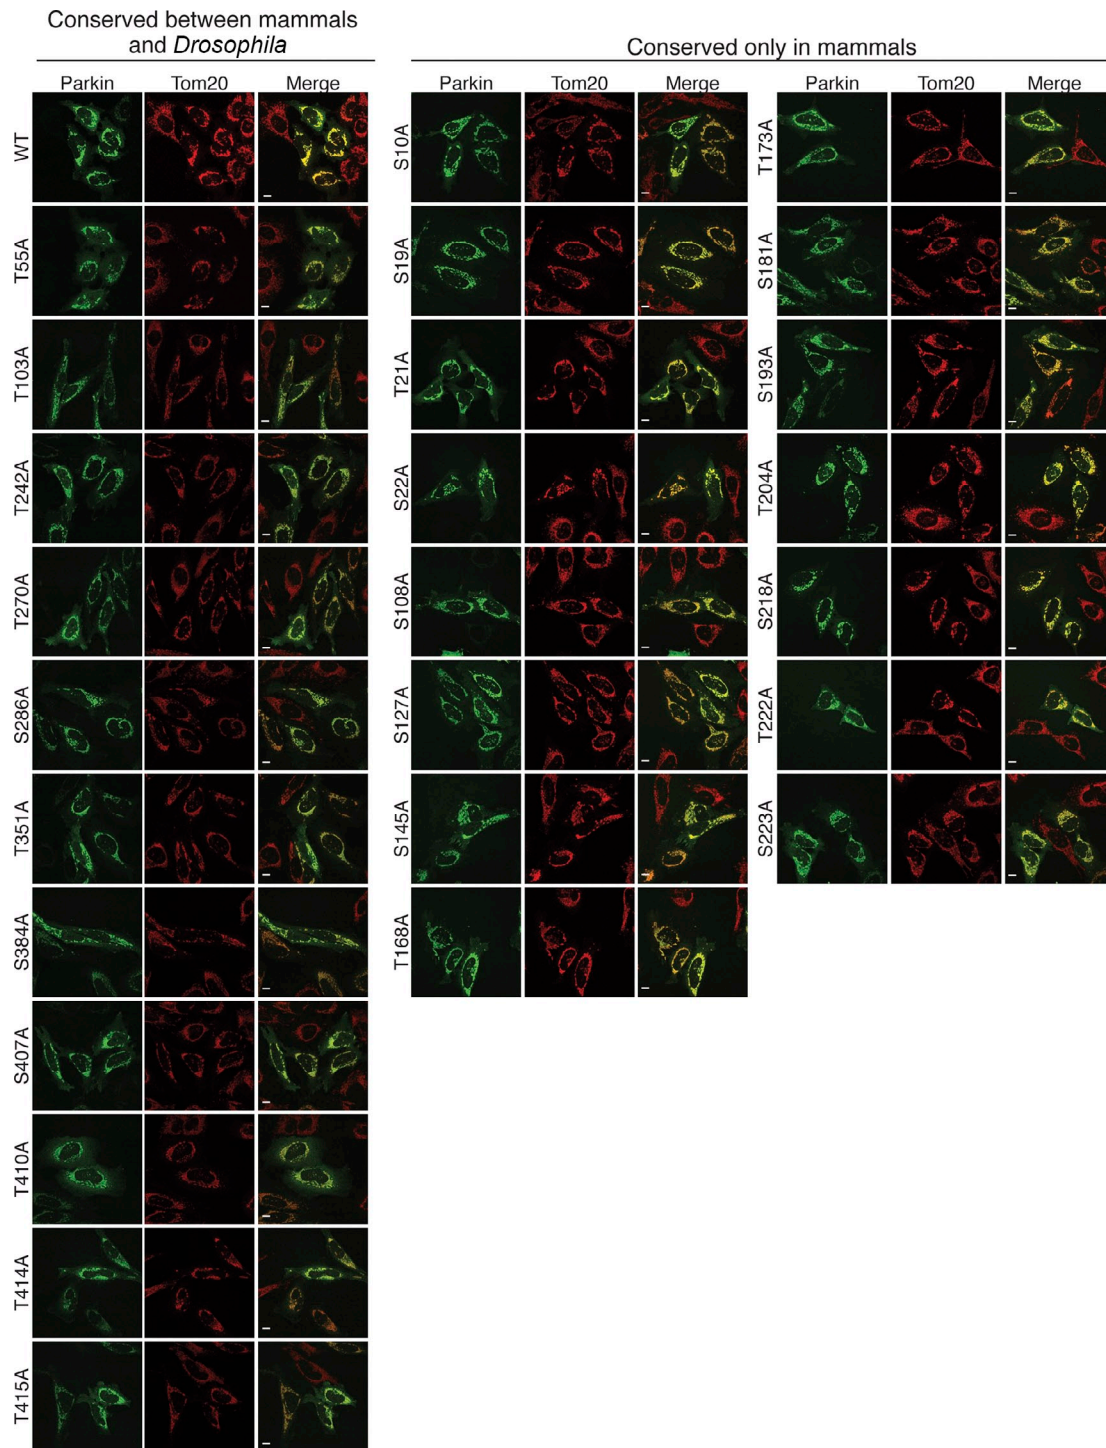

Figure S1. **Phosphorylation of conserved serine/threonine residues is not required for Parkin translocation.** Alanine mutants of all conserved serine/threonine residues of Parkin are all capable of translocating to damaged mitochondria in HeLa cells after treatment with 10  $\mu$ M CCCP for 2.5 h. Cells were immunostained for Parkin (green) and Tom20 (red, mitochondria). For quantification, see Table S1.

**Table S1** provides a list of all conserved Ser/Thr residues in Parkin and the quantitation of their mitochondrial translocation compared with WT and is provided as a Microsoft Excel file.

**Table S2** shows label-free quantification of ubiquitin amounts in MS samples and is provided as a Microsoft Excel file.

**Table S3** lists the primers used to create all Parkin and Ub phospho-site mutants and is provided as a Microsoft Excel file.
